# Supplementary material for: Acute Kidney Injury in Patients with Acute Myocardial Infarction Undergoing Percutaneous Coronary Intervention: The Role of Vascular Access Site
Source: MDPI journal article supplement (doi:10.3390/jcm13082367), 2024-04-18
Supplement: s1 [file s1]

Table S1. Univariate predictors of AKI.

|                | coefficient | SE   | lower   | upper   | p_value |
|----------------|-------------|------|---------|---------|---------|
| Female gender  | 1.12        | 0.23 | 0.6692  | 1.5708  | <0.001  |
| Hypertension   | 0.23        | 0.25 | -0.26   | 0.72    | 0.361   |
| Diabetes       | 0.55        | 0.23 | 0.0992  | 1.0008  | 0.017   |
| age >75        | 0.83        | 0.25 | 0.34    | 1.32    | <0.001  |
| STEMI          | -0.64       | 0.21 | -1.0516 | -0.2284 | 0.002   |
| dyslipidemia   | -0.1        | 0.22 | -0.5312 | 0.3312  | 0.668   |
| NYHA >1        | 0.66        | 0.32 | 0.0328  | 1.2872  | 0.039   |
| Previous MI    | 0.34        | 0.28 | -0.2088 | 0.8888  | 0.225   |
| Family history | -0.08       | 0.23 | -0.5308 | 0.3708  | 0.725   |
| Killip >1      | 1.09        | 0.24 | 0.6196  | 1.5604  | <0.001  |
| eGFR<60        | 1.35        | 0.25 | 0.86    | 1.84    | <0.001  |
| Hb < 12 g/dl   | 1.41        | 0.31 | 0.8024  | 2.0176  | <0.001  |
| BARC 3-5       | 0.6         | 0.26 | 0.0904  | 1.1096  | 0.021   |
| anemia         | 0.78        | 0.27 | 0.2508  | 1.3092  | 0.003   |
